# Supplementary material
Source: PubMed Central journal article supplement (PMC152685)
Supplement: cmaj_168_8_1001__1.pdf [file cmaj_168_8_1001__1.pdf]

**e-Table: Randomized controlled surrogate end-point trials of hormone replacement therapy for the prevention of coronary artery disease**

| Study                                                               | Therapy                 | No. of subjects | Mean duration, yr | Surrogate end point(s)                                                          | Treatment v. placebo                                                                                                                                                            |
|---------------------------------------------------------------------|-------------------------|-----------------|-------------------|---------------------------------------------------------------------------------|---------------------------------------------------------------------------------------------------------------------------------------------------------------------------------|
| <b>Primary prevention</b>                                           |                         |                 |                   |                                                                                 |                                                                                                                                                                                 |
| Postmenopausal Estrogen/Progestin Interventions Trial <sup>16</sup> | CEE with or without MPA | 875             | 3                 | Mean change in high-density lipoprotein cholesterol level (and 95% CI), mmol/L* | CEE: 0.14 (0.12 to 0.17)<br>CEE/MPA(cyc): 0.04 (0.01 to 0.07)<br>CEE/MPA(con): 0.03 (0.00 to 0.06)<br>CEE/MP(cyc): 0.11 (0.08 to 0.13)<br>v. -0.03 (-0.06 to -0.01)             |
|                                                                     |                         |                 |                   | Mean change in low-density lipoprotein cholesterol level (and 95% CI), mmol/L*  | CEE: -0.37 (-0.43 to -0.31)<br>CEE/MPA(cyc): -0.46 (-0.52 to -0.40)<br>CEE/MPA(con): -0.43 (-0.49 to -0.37)<br>CEE/MP(cyc): -0.38 (-0.44 to -0.32)<br>v. -0.11 (-0.17 to -0.05) |
| Estrogen in the Prevention of Atherosclerosis trial <sup>18</sup>   | Estradiol-17 $\beta$    | 222             | 2                 | Mean annual change in intima media thickness of common carotid artery, mm†      | -0.0017 v. 0.0036                                                                                                                                                               |
| <b>Secondary prevention</b>                                         |                         |                 |                   |                                                                                 |                                                                                                                                                                                 |
| Estrogen Replacement and Atherosclerosis trial <sup>17</sup>        | CEE with or without MPA | 309             | 3.2               | Mean change in minimal coronary artery diameter ( $\pm$ SE), mm‡                | CEE: -0.09 ( $\pm$ 0.02)<br>CEE/MPA: -0.12 ( $\pm$ 0.02)<br>v. -0.09 ( $\pm$ 0.02)                                                                                              |
| Women's Angiographic Vitamin and Estrogen Trial <sup>9</sup>        | CEE + MPA               | 423             | 2.8               | Mean annual change in minimal coronary artery diameter, mm§                     | -0.027 v. 0.007                                                                                                                                                                 |

Note: CEE = conjugated equine estrogen, MPA = medroxyprogesterone acetate, MP = micronized progesterone, cyc = cyclic administration (days 1-12 of each month), con = continuous administration, CI = confidence interval, SE = standard error.

\**p* (Bonferroni; nominal) < 0.01.

†*p* = 0.046.

‡*p* = 0.97 (CEE v. placebo) and 0.38 (CEE/MPA v. placebo).

§*p* = 0.20.
